# Supplementary material for: Structure-Based Cyclic Glycoprotein Ibα-Derived Peptides Interfering with von Willebrand Factor-Binding, Affecting Platelet Aggregation under Shear
Source: MDPI journal article supplement (doi:10.3390/ijms23042046), 2022-02-12
Supplement: s1 [file s1]

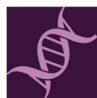

# Structure-based cyclic glycoprotein Ib $\alpha$ -derived peptides interfering with von Willebrand factor binding affecting platelet aggregation under shear

Johana Hrdinova <sup>1,2,†</sup>, Delia I. Fernández <sup>1,3,†</sup>, Bogac Ercig <sup>1,2</sup>, Bibian M.E. Tullemans <sup>1</sup>, Dennis P. L. Suylen <sup>1</sup>, Stijn M. Agten <sup>1</sup>, Kerstin Jurk <sup>4</sup>, Tilman M. Hackeng <sup>1</sup>, Karen Vanhoorelbeke <sup>5</sup>, Jan Voorberg <sup>2</sup>, Chris P. M. Reutelingsperger <sup>1</sup>, Kanin Wichapong <sup>1,†</sup>, Johan W. M. Heemskerk <sup>1,6,†</sup> and Gerry A. F. Nicolaes <sup>1,\*</sup>

<sup>1</sup> Department of Biochemistry, CARIM, Maastricht University, 6200 MD Maastricht, The Netherlands; <sup>2</sup> Department of Molecular and Cellular Hemostasis, Sanquin-Academic Medical Center, Amsterdam, The Netherlands; <sup>3</sup> Center for Thrombosis and Hemostasis (CTH), University Medical Center of the Johannes Gutenberg University Mainz, 55131 Mainz, Germany; <sup>4</sup> Laboratory for Thrombosis Research, Interdisciplinary Research Facility Life Sciences, Katholieke Universiteit Leuven Campus Kulak Kortrijk, Kortrijk, Belgium.

<sup>6</sup> Synapse Research Institute, Kon. Emmalein 7, 6214 AC Maastricht, The Netherlands.

\* Equal contribution

\* Correspondence: g.nicolaes@maastrichtuniversity.nl

## Supplementary Methods

### Solid Phase Synthesis of Mono- and Bi-Cyclic Peptides

The reduced peptides mono-ORbIT (H<sub>2</sub>N-DDNAENCYVWKQGDE VRAMR SNCAEE-COOH), *opt*-mono-ORbIT (Ac-EDDNAECAYVEAEGDEARDQRSNCQ DED-COOH), and the linear form of bi-ORbIT (Ac-CDVWNESAFDEYSIAESES ECNEY-VDEPSYTSC-COOH) were synthesized by manual solid-phase peptide synthesis on a 0.20 mmol scale using the *in situ* neutralization/activation procedure for Boc/Bzl peptide synthesis as previously described,<sup>29</sup> but using HCTU instead of HBTU as a coupling reagent. Glu(OBzl)-PAM resin (0.71 mmol/g), Asp(OBzl)-PAM resin (0.72 mmol/g) and Cys(MeBzl)-PAM resin (0.73 mmol/g) were used as the solid support for mono-ORbIT, *opt*-mono-ORbIT and bi-ORbIT, respectively. After completion of the peptide chain, the resin-bound peptide was washed with dimethylformamide, treated with trifluoroacetic acid (2 × 1 min) to remove the N-terminal Boc group, washed with dimethylformamide, dichloromethane and 1:1 *v/v* dichloromethane/methanol and dried. *Opt*-mono-ORbIT and bi-ORbIT were N-terminally acetylated by treatment with 1:1 acetic anhydride:pyridine for 5 min. The peptides were then sidechain-deprotected and cleaved from resin by treatment with anhydrous HF for 1 h at 0°C, using 4 *vol%* *p*-cresol as a scavenger. Following cleavage, peptides were precipitated in ice-cold diethyl ether. Subsequently, peptides were extracted with 0.1 M sodium acetate buffer (pH 4) containing 6 M guanidine HCl and purified by preparative HPLC (mono-ORbIT and bi-ORbIT). Fractions containing the desired product were identified by UPLC-MS, pooled and lyophilized. *Opt*-mono-ORbIT was extracted from diethyl ether using 50% MeCN in H<sub>2</sub>O+0.1% TFA and used in subsequent steps without further purification.

To facilitate formation of the disulfide connection the reduced purified mono-ORbIT was dissolved at 0.3 mg/mL into 1 M guanidine HCl, 0.1 M Tris buffer (pH 8.0), and was stirred for 24 h at 4°C in the presence of 8 mM cysteine and 1 mM cystine as redox couple. Folding progress was monitored by UPLC-MS, appearing as a mass decrease of -2 Da (2 protons, 1 disulfide bound) resulting in a final mass of 3029.32 Da (Supplementary figure 1B), corresponding to the calculated monoisotopic mass of the folded, cyclic mono-ORbIT

peptide. After semi-preparative HPLC, the product-containing fractions were identified by UPLC-MS, pooled and lyophilized.

For the bicyclic peptide, bi-ORbIT, Cys(Mebzl)-PAM resin (0.73 mmol/g) was used as the solid support. Next, the resin-bound peptide was acetylated on N-terminal acetylation using a 1:1 mixture of pyridine/acetic anhydride for 5 min. The peptide was washed with dimethylformamide, dichloromethane and 1:1 *v/v* dichloromethane/methanol and dried. The peptide was further deprotected and cleaved from the resin by treatment with anhydrous HF for 1 h at 0°C, using 4 *vol%* *p*-cresol as a scavenger. Following cleavage, the peptide was precipitated with ice-cold diethyl ether, dissolved in 0.1 M sodium acetate buffer (pH 4) containing 6 M guanidine HCl, and purified by preparative HPLC. Fractions containing the desired product were identified by UPLC-MS, pooled, and lyophilized.

The crude linear peptide of the optimized construct, *opt*-mono-ORbIT, was dissolved at 3 mg/mL into 1 M guanidine HCl, 0.1 M Tris buffer (pH 8.0) and treated with 1% peroxide solution to oxidize the free thiols and form the desired disulfide bridge. Folding progress was monitored by UPLC-MS, appearing as a mass decrease of -2 Da (2 protons, 1 disulfide bound) resulting in a final mass of 3215.10 Da, corresponding to the calculated monoisotopic mass of the folded, cyclic *opt*-mono-ORbIT peptide. After semi-preparative HPLC, the product-containing fractions were identified by UPLC-MS, pooled and lyophilized.

Linear peptide chain of bicyclic peptide, bi-ORbIT, was cyclized by reaction with a 1,3,5-tris(bromomethyl)benzene scaffold (T3) to connect three cysteine residues resulting in a generation of bicyclic peptides as previously described.<sup>40-42</sup> The peptide was dissolved at 2 mg/mL in 50 mM ammonium bicarbonate buffer pH 7.8. One equivalent T3 scaffold (stock solution of 2 mg/mL in acetonitrile) was added to the linear peptide every 30 min until full cyclization was realized. Cyclization progress was monitored by UPLC-MS, resulting in a final mass of 4042.50 Da, corresponding to the calculated monoisotopic mass of the cyclized peptide. After semi-preparative HPLC, product containing fractions were identified by UPLC-MS, pooled and lyophilized.

### **Semi-Preparative HPLC Purification and Mass Spectrometry**

Semi-preparative reversed-phase HPLC was performed by using a Vydac C-18 column (250 x 10 mm, 10  $\mu$ m). A linear gradient of acetonitrile in water/0.1% trifluoroacetic acid was used to elute the peptide using a flow rate of 12 mL/min. UPLC-MS was performed on a Waters XEVO QTOF G2 mass spectrometer, with an Acquity H-class solvent manager, FTN-sample manager and TUV-detector. The system was equipped with a reversed phase C<sub>18</sub>-column (Waters, Acquity PST 130 A, 1.7  $\mu$ m 2.1 x 50 mm), column temperature 40°C. The mobile phases consisted of 0.1% formic acid in water and 90% acetonitrile. FTN-purge solvent was 10% acetonitrile in water. Gradient condition: starting with 10% acetonitrile to 55% acetonitrile in 15 min, absorbance detection at 220 nm wavelength.

# Supplemental Figures

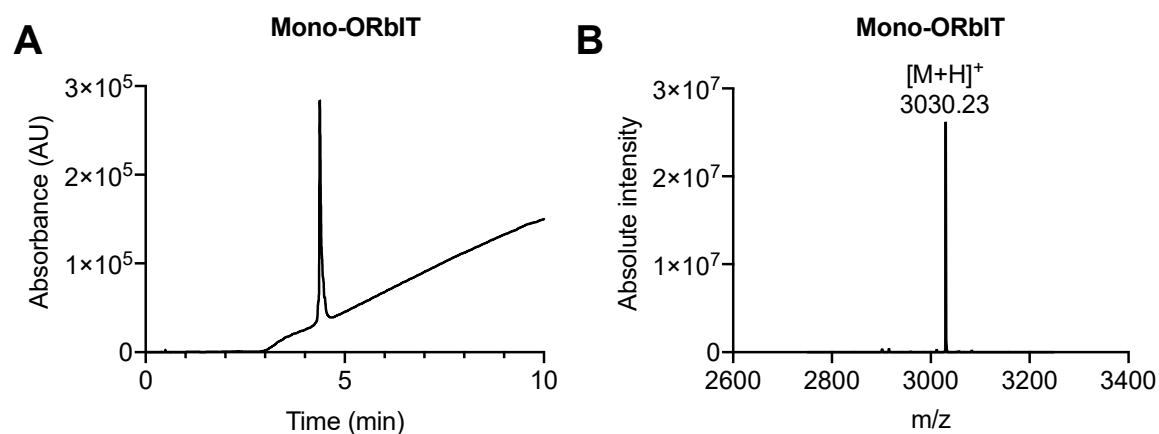

**Figure S1.** Representative spectra of chemically synthesized and purified mono-ORbIT. A, UV spectrum and B, mass spectrum of mono-ORbIT.

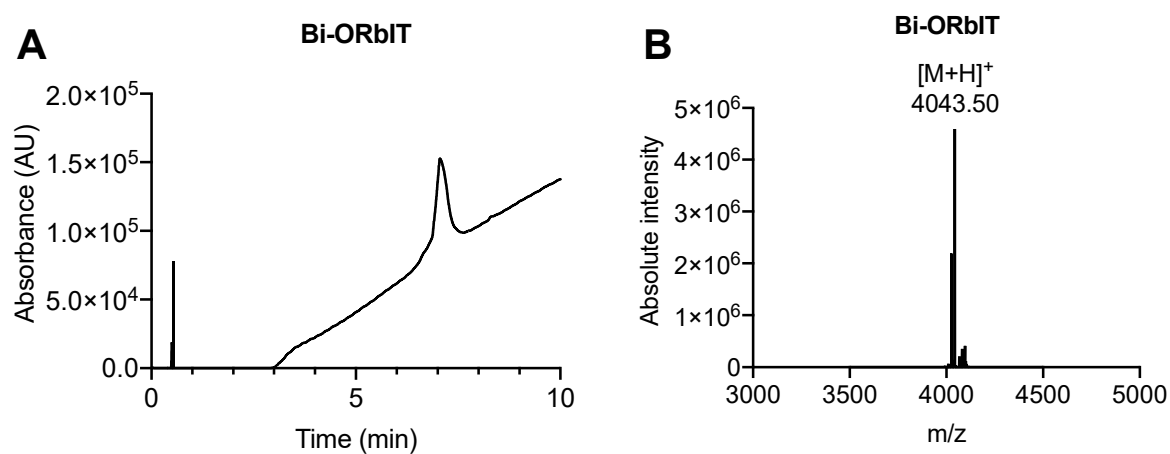

**Figure S2.** Representative spectra of chemically synthesized and purified bi-ORbIT. A, UV spectrum and B, mass spectrum of bi-ORbIT.

## A Collagen-I (M1)

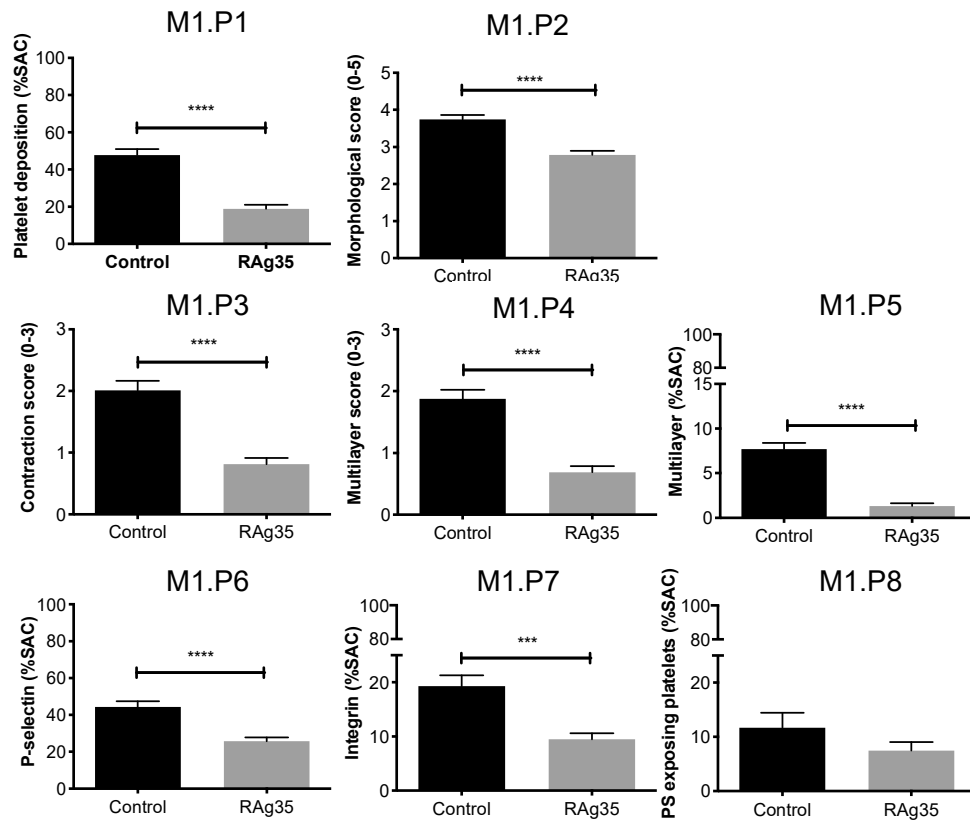

## B Collagen-III (M2)

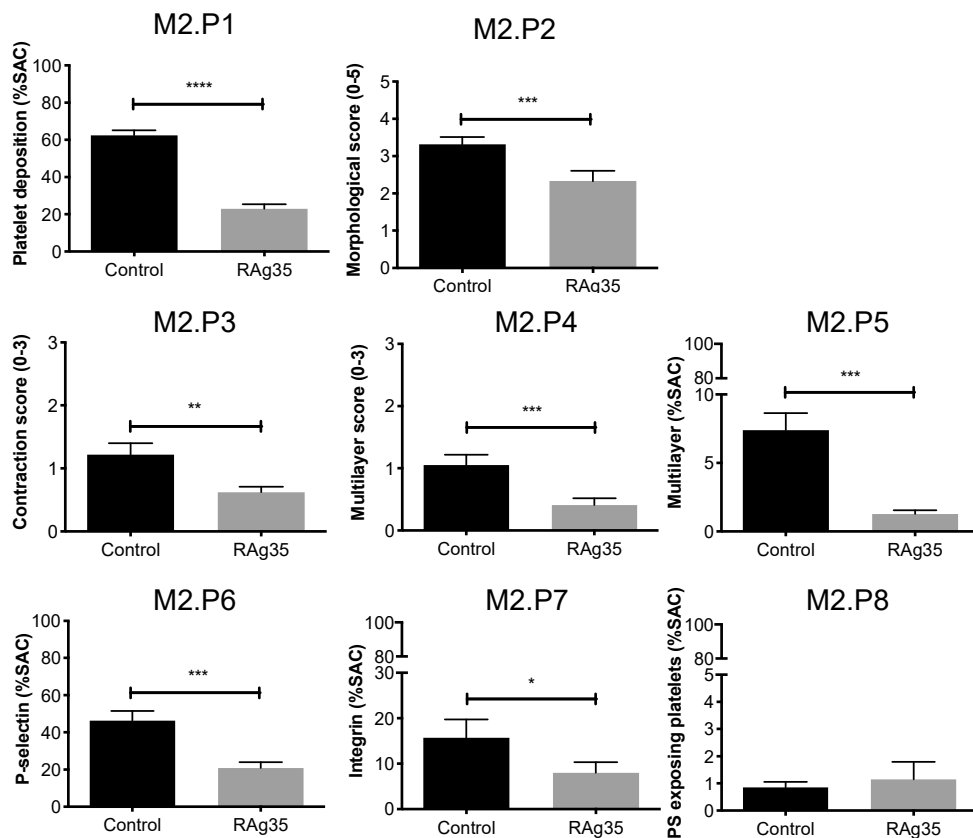

## C VWF/fibrinogen (M3)

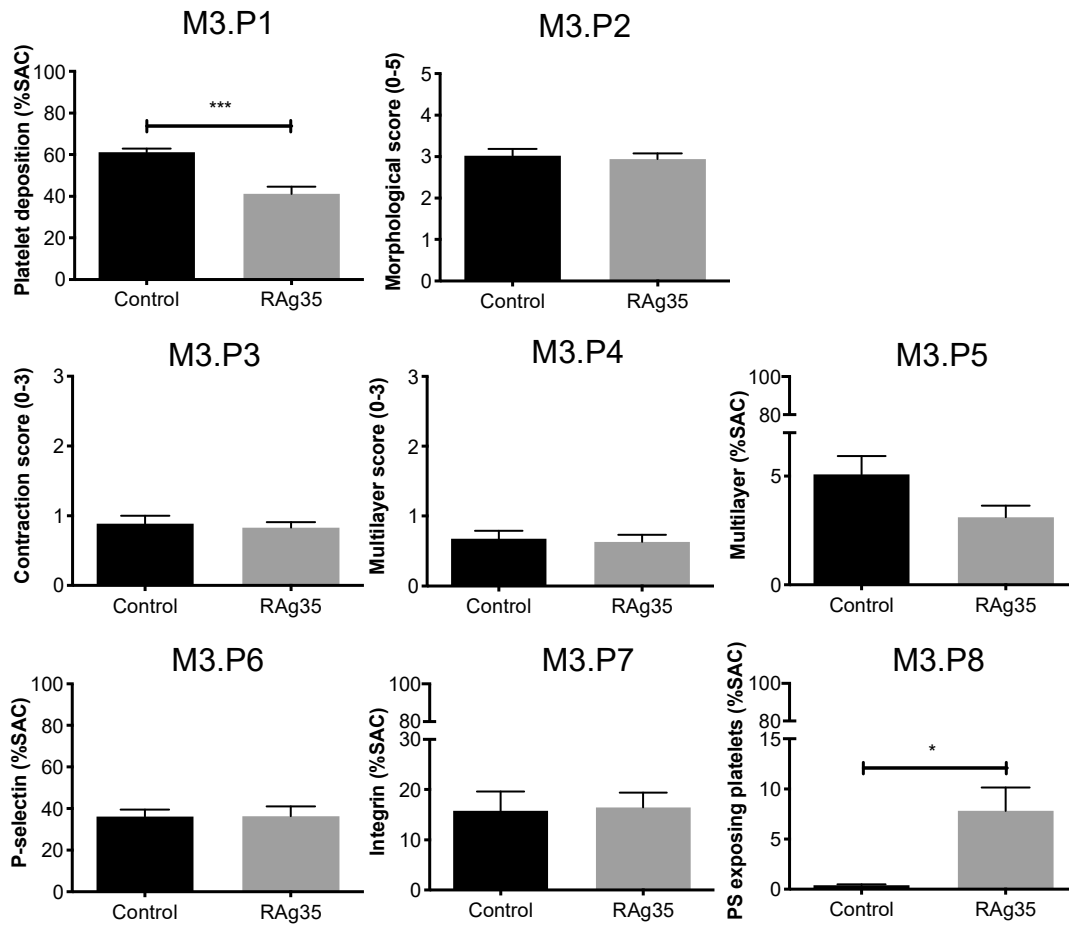

**Figure S3. Effect of CLB-RAg35 on thrombus formation at high-shear flow.** Microspot thrombus formation was performed, as described in Figure 1. Shown are calculated effects of CLB-RAg35 vs. control for microspot M1 (A), microspot M2 (B) and microspot M3 (C), per parameter (P1-8). Paired Student's t-test, \* $P < 0.05$ , \*\* $P < 0.01$ , \*\*\* $P < 0.001$ , \*\*\*\* $P < 0.0001$  ( $n=10$ ).

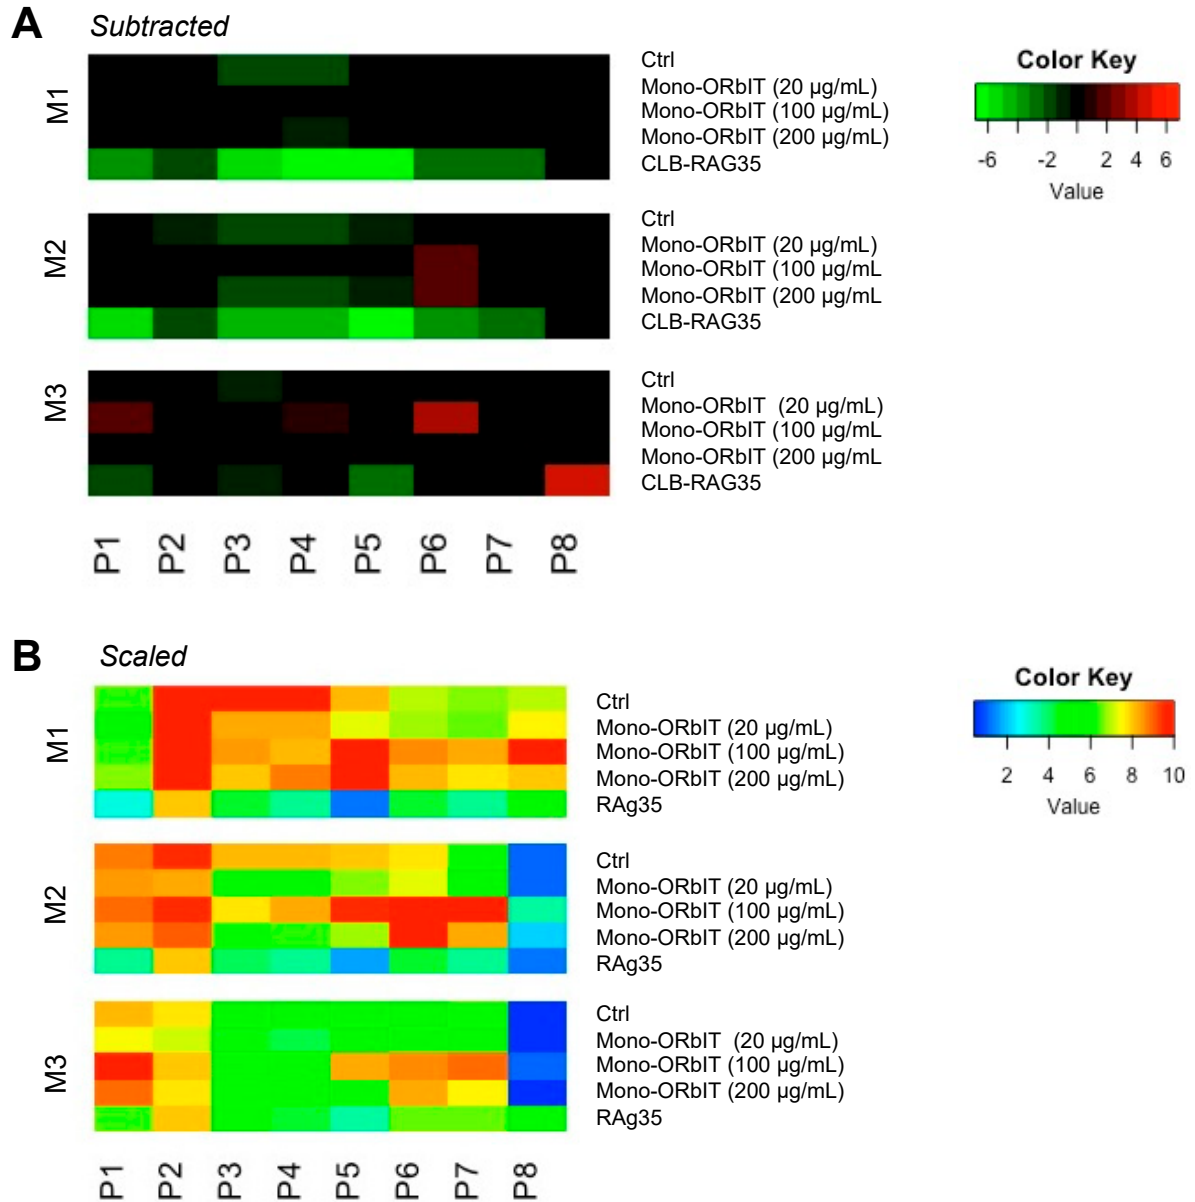

**Figure S4. Effects of mono-ORbIT on thrombus formation under flow.** Whole blood was preincubated for 10 min in parallel with mono-ORbIT (20, 100 and 200 µg/mL), CLB-RAG35 (Rag35, 10 µg/mL), or control (saline). Samples were perfused over microspots consisting of collagen-I (M1), collagen-III (M2) or VWF/fibrinogen (M3) for 3.5 min at wall-shear rate of 1600 s<sup>-1</sup>, and then stained, as indicated for Figure 3. Mean values from individual blood samples ( $n=13$  donors) were scaled 0-10 per parameter across all microspots M1-3. **A**, Heatmap representation of control-subtracted data. Color coding indicates decrease (green) or increase (red) in comparison to control runs. **B**, Heatmap of mean data per parameter and microspot of thrombus formation. Raw data were scaled on range 0-10 per parameter (P1-8) across all microspots. ( $n=6-13$  donors). See Suppl. Table 3.

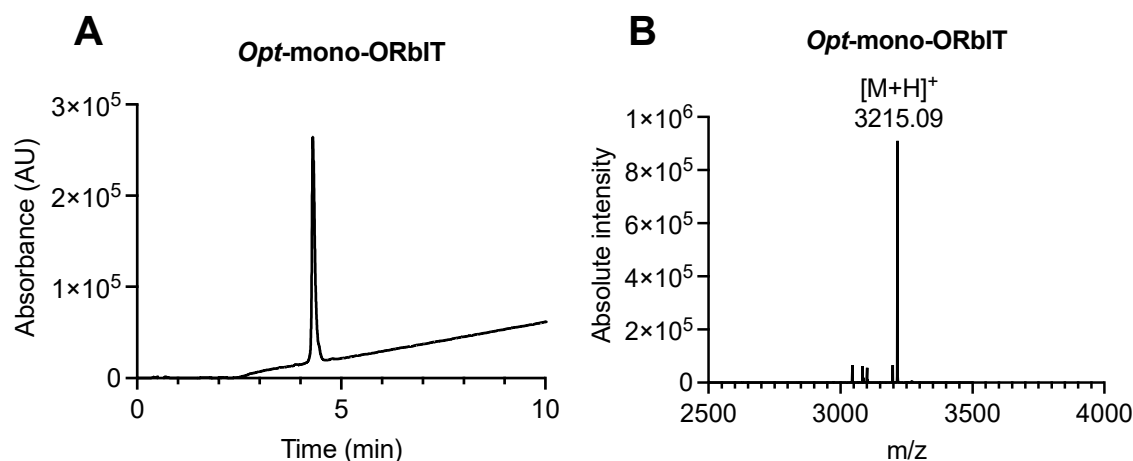

**Figure S5.** Representative spectra of chemically synthesized and purified *opt*-mono-ORbIT. A, UV spectrum and B, mass spectrum of *opt*-mono-ORbIT.

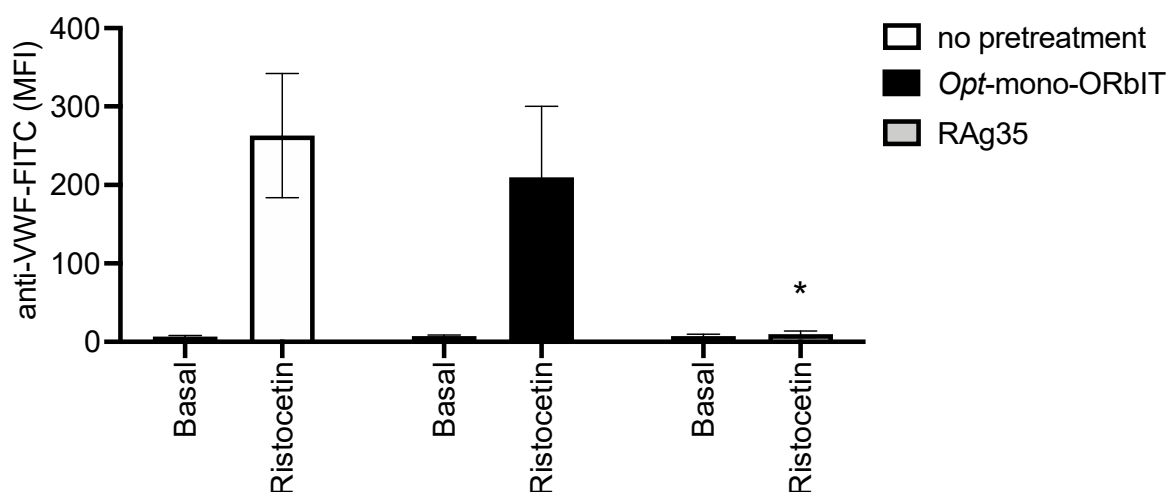

**Figure S6.** Effect of *opt*-mono-ORbIT on ristocetin-induced platelet binding to VWF. Diluted PRP containing tirofiban (1.25  $\mu$ g/mL) was pre-incubated with 200  $\mu$ g/mL *opt*-mono-ORbIT for 10 min at room temperature. Mixture was subsequently activated for 6 min with ristocetin (0.5 mg/mL). Samples were fixed and labeled with FITC-conjugated anti-VWF antibody. Selected gated population of single platelets was used for the analyses. VWF binding calculated as mean fluorescence intensity (MFI). Paired Student's *t*-test, \**P*<0.05 (*n*=3 donors).

### Supplemental Tables

**Table S1.** Raw data per microspot and parameter of control/mono-ORbIT peptide on whole-blood thrombus formation. Data are mean  $\pm$  SD, *n*=7 donors for mono-ORbIT. For explanation, see Figure 4.

|    | Condition                  | P1                | P2              | P3              | P4              | P5               | P6                | P7                | P8               |
|----|----------------------------|-------------------|-----------------|-----------------|-----------------|------------------|-------------------|-------------------|------------------|
| M1 | Control                    | 44.99 $\pm$ 8.62  | 3.62 $\pm$ 0.22 | 1.75 $\pm$ 0.39 | 1.76 $\pm$ 0.30 | 11.33 $\pm$ 4.50 | 45.22 $\pm$ 9.12  | 22.84 $\pm$ 10.73 | 8.83 $\pm$ 4.21  |
| M1 | Mono-OR-bIT 20 $\mu$ g/mL  | 42.37 $\pm$ 12.96 | 3.48 $\pm$ 0.37 | 1.46 $\pm$ 0.61 | 1.46 $\pm$ 0.49 | 10.22 $\pm$ 4.77 | 43.94 $\pm$ 12.52 | 22.12 $\pm$ 11.73 | 9.63 $\pm$ 3.58  |
| M1 | Mono-OR-bIT 100 $\mu$ g/mL | 44.87 $\pm$ 6.15  | 3.58 $\pm$ 0.30 | 1.48 $\pm$ 0.32 | 1.44 $\pm$ 0.27 | 13.47 $\pm$ 1.99 | 55.25 $\pm$ 8.94  | 28.50 $\pm$ 6.12  | 12.69 $\pm$ 5.55 |
| M1 | Mono-OR-bIT 200 $\mu$ g/mL | 46.89 $\pm$ 8.76  | 3.48 $\pm$ 0.20 | 1.40 $\pm$ 0.28 | 1.54 $\pm$ 0.25 | 14.00 $\pm$ 1.96 | 52.99 $\pm$ 9.89  | 26.11 $\pm$ 9.92  | 10.12 $\pm$ 3.88 |
| M2 | Control                    | 62.16 $\pm$ 10.54 | 3.44 $\pm$ 0.53 | 1.42 $\pm$ 0.52 | 1.44 $\pm$ 0.39 | 11.26 $\pm$ 3.60 | 50.09 $\pm$ 9.73  | 21.05 $\pm$ 12.44 | 1.44 $\pm$ 1.12  |

|    |                                  |                   |                 |                 |                 |                  |                   |                   |                 |
|----|----------------------------------|-------------------|-----------------|-----------------|-----------------|------------------|-------------------|-------------------|-----------------|
| M2 | Mono-OR-bIT 20 $\mu\text{g/mL}$  | 59.31 $\pm$ 10.19 | 3.02 $\pm$ 0.83 | 1.04 $\pm$ 0.67 | 1.04 $\pm$ 0.65 | 9.44 $\pm$ 4.50  | 47.14 $\pm$ 17.09 | 19.47 $\pm$ 11.29 | 1.30 $\pm$ 0.97 |
| M2 | Mono-OR-bIT 100 $\mu\text{g/mL}$ | 62.81 $\pm$ 7.66  | 3.42 $\pm$ 0.52 | 1.35 $\pm$ 0.50 | 1.46 $\pm$ 0.46 | 13.31 $\pm$ 2.10 | 64.46 $\pm$ 6.06  | 34.03 $\pm$ 10.58 | 4.44 $\pm$ 5.95 |
| M2 | Mono-OR-bIT 200 $\mu\text{g/mL}$ | 59.85 $\pm$ 10.60 | 3.29 $\pm$ 0.37 | 1.08 $\pm$ 0.13 | 1.13 $\pm$ 0.14 | 9.65 $\pm$ 1.68  | 62.40 $\pm$ 3.14  | 28.34 $\pm$ 11.00 | 2.61 $\pm$ 2.48 |
| M3 | Control                          | 57.26 $\pm$ 17.33 | 2.79 $\pm$ 1.14 | 0.99 $\pm$ 0.54 | 0.92 $\pm$ 0.50 | 8.17 $\pm$ 5.53  | 35.16 $\pm$ 17.35 | 20.55 $\pm$ 14.39 | 0.54 $\pm$ 0.55 |
| M3 | Mono-OR-bIT 20 $\mu\text{g/mL}$  | 52.39 $\pm$ 22.43 | 2.58 $\pm$ 1.00 | 0.79 $\pm$ 0.54 | 0.75 $\pm$ 0.55 | 7.26 $\pm$ 5.36  | 38.69 $\pm$ 21.60 | 19.78 $\pm$ 14.55 | 0.56 $\pm$ 0.59 |
| M3 | Mono-OR-bIT 100 $\mu\text{g/mL}$ | 70.55 $\pm$ 10.30 | 2.88 $\pm$ 0.38 | 0.98 $\pm$ 0.34 | 1.02 $\pm$ 0.32 | 11.59 $\pm$ 3.34 | 55.76 $\pm$ 11.77 | 30.07 $\pm$ 10.71 | 1.32 $\pm$ 1.25 |
| M3 | Mono-OR-bIT 200 $\mu\text{g/mL}$ | 63.13 $\pm$ 8.93  | 2.79 $\pm$ 0.51 | 0.88 $\pm$ 0.31 | 0.85 $\pm$ 0.28 | 8.42 $\pm$ 3.29  | 53.74 $\pm$ 11.86 | 25.92 $\pm$ 14.47 | 0.68 $\pm$ 0.61 |

**Table S2.** Raw data per microspot and parameter of bi-ORbIT peptide on whole-blood thrombus formation. Data are mean.

|    | Condition | P1                | P2              | P3              | P4              | P5              | P6                | P7                | P8               |
|----|-----------|-------------------|-----------------|-----------------|-----------------|-----------------|-------------------|-------------------|------------------|
| M1 | Control   | 46.80 $\pm$ 10.18 | 3.78 $\pm$ 0.48 | 2.19 $\pm$ 0.33 | 2.01 $\pm$ 0.7  | 8.57 $\pm$ 2.67 | 49.75 $\pm$ 7.12  | 20.31 $\pm$ 6.55  | 13.83 $\pm$ 2.45 |
| M1 | Bi-ORbIT  | 40.40 $\pm$ 8.87  | 3.45 $\pm$ 0.45 | 1.75 $\pm$ 0.5  | 1.38 $\pm$ 0.47 | 7.89 $\pm$ 2.47 | 50.09 $\pm$ 7.12  | 17.22 $\pm$ 8.66  | 14.14 $\pm$ 4.63 |
| M2 | Control   | 58.43 $\pm$ 5.33  | 3.12 $\pm$ 0.63 | 0.95 $\pm$ 0.37 | 0.65 $\pm$ 0.22 | 4.59 $\pm$ 2.15 | 49.55 $\pm$ 12.04 | 15.00 $\pm$ 13.89 | 0.80 $\pm$ 0.62  |
| M2 | Bi-ORbIT  | 56.87 $\pm$ 6.11  | 3.03 $\pm$ 0.61 | 0.69 $\pm$ 0.19 | 0.51 $\pm$ 0.24 | 5.16 $\pm$ 0.84 | 50.39 $\pm$ 10.94 | 13.80 $\pm$ 10.94 | 1.69 $\pm$ 4.22  |
| M3 | Control   | 51.68 $\pm$ 12.37 | 3.03 $\pm$ 0.68 | 0.72 $\pm$ 0.14 | 0.43 $\pm$ 0.19 | 3.84 $\pm$ 1.79 | 41.14 $\pm$ 11.56 | 16.51 $\pm$ 15.22 | 0.44 $\pm$ 0.28  |
| M3 | Bi-ORbIT  | 50.53 $\pm$ 10.22 | 2.80 $\pm$ 0.56 | 0.51 $\pm$ 0.11 | 0.33 $\pm$ 0.19 | 3.58 $\pm$ 1.53 | 14.31 $\pm$ 10.38 | 39.21 $\pm$ 14.14 | 0.44 $\pm$ 0.53  |

$\pm$  SD,  $n=5$  donors bi-ORbIT. For explanation, see Figure 5.

**Table S3.** Raw data per microspot and parameter of control/Mono-ORbIT2 peptide on whole-blood thrombus formation.

| .  | Condition                           | P1                | P2              | P3              | P4              | P5               | P6               | P7                | P8                |
|----|-------------------------------------|-------------------|-----------------|-----------------|-----------------|------------------|------------------|-------------------|-------------------|
| M1 | Control                             | 44.35 $\pm$ 11.96 | 3.93 $\pm$ 0.37 | 2.01 $\pm$ 0.31 | 2.17 $\pm$ 0.48 | 15.47 $\pm$ 3.86 | 9.85 $\pm$ 2.23  | 54.25 $\pm$ 6.97  | 28.06 $\pm$ 7.16  |
| M1 | Opt-mono-ORbIT 20 $\mu\text{g/ml}$  | 40.07 $\pm$ 12.57 | 3.27 $\pm$ 0.28 | 1.39 $\pm$ 0.48 | 1.45 $\pm$ 0.48 | 11.10 $\pm$ 3.63 | 9.84 $\pm$ 4.07  | 49.91 $\pm$ 7.19  | 24.22 $\pm$ 8.43  |
| M1 | Opt-mono-ORbIT 100 $\mu\text{g/ml}$ | 44.99 $\pm$ 12.37 | 3.46 $\pm$ 0.47 | 1.45 $\pm$ 0.44 | 1.55 $\pm$ 0.44 | 12.49 $\pm$ 2.65 | 10.93 $\pm$ 5.02 | 55.05 $\pm$ 6.76  | 30.60 $\pm$ 8.68  |
| M1 | Opt-mono-ORbIT 200 $\mu\text{g/ml}$ | 36.45 $\pm$ 15.93 | 3.38 $\pm$ 0.33 | 1.29 $\pm$ 0.51 | 1.50 $\pm$ 0.33 | 15.26 $\pm$ 1.76 | 9.87 $\pm$ 6.14  | 54.76 $\pm$ 8.69  | 26.74 $\pm$ 12.58 |
| M2 | Control                             | 58.62 $\pm$ 15.08 | 3.90 $\pm$ 0.40 | 1.85 $\pm$ 0.45 | 1.81 $\pm$ 0.43 | 16.78 $\pm$ 6.77 | 1.75 $\pm$ 1.04  | 60.39 $\pm$ 10.05 | 31.27 $\pm$ 7.81  |
| M2 | Opt-mono-ORbIT 20 $\mu\text{g/ml}$  | 54.37 $\pm$ 16.61 | 3.25 $\pm$ 0.25 | 1.29 $\pm$ 0.42 | 1.36 $\pm$ 0.38 | 12.32 $\pm$ 3.31 | 2.28 $\pm$ 1.79  | 56.22 $\pm$ 9.58  | 22.08 $\pm$ 10.79 |
| M2 | Opt-mono-ORbIT 100 $\mu\text{g/ml}$ | 57.32 $\pm$ 17.83 | 3.27 $\pm$ 0.48 | 1.14 $\pm$ 0.38 | 1.29 $\pm$ 0.46 | 13.09 $\pm$ 4.05 | 3.21 $\pm$ 2.52  | 57.44 $\pm$ 8.77  | 31.53 $\pm$ 10.16 |
| M2 | Opt-mono-ORbIT 200 $\mu\text{g/ml}$ | 46.02 $\pm$ 20.93 | 2.83 $\pm$ 0.19 | 0.96 $\pm$ 0.31 | 1.04 $\pm$ 0.19 | 14.56 $\pm$ 4.18 | 1.62 $\pm$ 2.11  | 57.61 $\pm$ 11.13 | 27.79 $\pm$ 15.59 |
| M3 | Control                             | 65.43 $\pm$ 13.27 | 3.40 $\pm$ 0.26 | 1.36 $\pm$ 0.26 | 1.31 $\pm$ 0.28 | 14.03 $\pm$ 7.06 | 1.28 $\pm$ 1.18  | 54.45 $\pm$ 8.09  | 32.98 $\pm$ 8.80  |
| M3 | Opt-mono-ORbIT 20 $\mu\text{g/ml}$  | 61.54 $\pm$ 20.01 | 3.09 $\pm$ 0.76 | 1.20 $\pm$ 0.58 | 1.18 $\pm$ 0.59 | 10.86 $\pm$ 5.60 | 1.06 $\pm$ 1.40  | 51.02 $\pm$ 7.21  | 25.29 $\pm$ 8.37  |



|    |                                     |             |           |           |           |            |           |             |            |
|----|-------------------------------------|-------------|-----------|-----------|-----------|------------|-----------|-------------|------------|
| M3 | <i>Opt</i> -mono-ORbIT 100<br>μg/ml | 63.94±13.54 | 2.89±0.57 | 1.00±0.38 | 1.04±0.36 | 10.83±5.10 | 2.97±4.18 | 53.73±10.58 | 33.17±9.12 |
| M3 | <i>Opt</i> -mono-ORbIT 200<br>μg/ml | 50.29±18.69 | 2.67±0.63 | 0.75±0.45 | 0.75±0.50 | 13.97±6.46 | 2.58±3.62 | 55.54±13.96 | 29.52±18.4 |

---

Data are means ± SD, *n*=3-7 donors for mono-ORbIT2.
